# Supplementary material for: Emotional Reactions to Protective Policies on the Political Spectrum
Source: publisher site journal article supplement (doi:10.1515/spp-2025-0020), 2025-10-25
Supplement: Supplementary file 1 [file j_spp-2025-0020_suppl_001.docx]

**Supplement**

We have tested relationships between political orientations (both general and socio-cultural) and the intensity of emotions evoked by different protective policies. The results of these analyses are summarized in Tables S1 and S2.

For the area of protective policies regarding **economy**, the strongest correlation with general political orientation was observed for anger (*r* = .12, *p* < .001), indicating that the more on the right of the spectrum people are, the more anger they experience when thinking about economic protection the State provides. Other correlations did not exceed *r* = .10, suggesting that while some associations were statistically significant, their effect sizes were marginal. For socio-cultural political orientation, the more conservative individuals were the stronger feelings of contempt (*r* = .12, *p* < .001), anger (*r* = .13, *p* < .001), and despair (*r* = .10, *p* < .001) were reported in response to economic protection.

In the area of protective policies regarding **social welfare**, the only correlation that achieved at least *r* = .10 was enthusiasm (*r* = .10, *p* < .001), which was higher among conservative than liberal participants (thus, socio-cultural political orientation).

In the case of protective policies regarding **health**, none of the correlations with any political orientation exceeded *r* = .10.

For protective policies regarding **security from crime and terrorism**, there were only two significant and acceptably strong correlations with socio-cultural political orientation: calmness was more intense among more liberal people (*r* = .10, *p* < .001), and so was anger (*r* = .10, *p* < .001). For general political orientation, no correlation exceeded *r* = .10.

In the area of protective policies regarding **one's own way of life**, only dissatisfaction was stronger among people with more right-wing general political orientation (*r* = .10, *p* < .001). Other correlations did not exceed *r* = .10.

Policies in the area of **tradition and culture of Poland** evoked more intense negative emotions in people on the general political right: fear (*r* = .15, *p* < .001), anxiety (*r* = .11, *p* < .001), shame (*r* = .13, *p* < .001), sadness (*r* = .12, *p* < .001), contempt (*r* = .13, *p* < .001), anger (*r* = .20, *p* < .001), disgust (*r* = .12, *p* < .001), disappointment (*r* = .14, *p* < .001), despair (*r* = .19, *p* < .001), grief (*r* = .10, *p* < .001) and dissatisfaction (*r* = .20, *p* < .001). Similar associations were found for socio-cultural political orientation: more conservative people felt more fear (*r* = .15, *p* < .001), anxiety (*r* = .11, *p* < .001), shame (*r* = .13, *p* < .001), sadness (*r* = .12, *p* < .001), contempt (*r* = .13, *p* < .001), anger (*r* = .20, *p* < .001), disgust (*r* = .12, *p* < .001), disappointment (*r* = .14, *p* < .001), despair (*r* = .19, *p* < .001), grief (*r* = .10, *p* < .001) and dissatisfaction (*r* = .20, *p* < .001) than more liberal people. The only emotion stronger among liberal participants was calmness (*r* = -.11, *p* < .001).

The opposite is true for climate, which evokes more intense negative emotions: anxiety (*r* = -.13, *p* < .001) and disappointment (*r* = -.10, *p* < .001), in people who have a more left-wing orientation (general political orientation) and are more liberal (socio-cultural political orientation).

**Table S1.**

*Correlations between the general political orientations and intensity of emotions per policy area*

|  | area of economy | area of social welfare | area of health | area of security from crime and terrorism | area of own way of life | area of tradition and culture | area of climate and environ-ment |
| --- | --- | --- | --- | --- | --- | --- | --- |
|  | general political orientation | | | | | | |
| Happiness | .08** | -.002 | .08** | .07* | .04 | 0.03 | .08** |
| Pride | .03 | .01 | .06* | .02 | .04 | 0.03 | 0 |
| Enthusiasm | .04 | .06* | .08* | .02 | .01 | 0.03 | .02 |
| Satisfaction | -.01 | .08* | .02 | -.04 | -.003 | -0.04 | -.01 |
| Compassion | .06* | -.02 | .003 | -.04 | -.03 | -0.01 | -.03 |
| Gratitude | .09** | .08** | .03 | .04 | .02 | .07* | .04 |
| Curiosity | .02 | .03 | .03 | .03 | .01 | -.02 | .06 |
| Calmness | .01 | -.01 | -.01 | -.02 | -.07* | -.08* | .06* |
| Optimism | -.02 | .02 | .01 | -.07* | .001 | -.05 | -.05 |
| Joy | .05 | -.002 | -.09** | -.02 | .01 | .06* | .001 |
| Discouragement | -.02 | -.002 | -.02 | -.04 | .04 | -.01 | -0.05 |
| Hope | .002 | .02 | .02 | .01 | -.04 | .01 | .07* |
| Fear | .01 | .003 | .05 | .02 | .01 | .15*** | -.06* |
| Anxiety | .02 | -.03 | -.06* | .04 | .02 | .11*** | -.13*** |
| Shame | .05 | -.03 | -.02 | .03 | -.06 | .13*** | -004 |
| Sadness | -.04 | -.05 | -.01 | .04 | .03 | .12*** | -.09** |
| Contempt | .09** | .01 | .02 | .05 | -.002 | .13*** | .09** |
| Anger | .12*** | .04 | -.02 | .09** | .03 | .20*** | -.02 |
| Envy | -.01 | -.06 | -.01 | .02 | .06 | .04 | -.04 |
| Disgust | .06* | .03 | .01 | .04 | .03 | .12*** | .05 |
| Disappointment | .04 | -.05 | -.06 | .02 | .05 | .14*** | -.10*** |
| Guilt | .02 | -.01 | .02 | -.02 | .01 | .02 | -.07* |
| Hate | .04 | -.05 | -.01 | .01 | .002 | .08* | -.01 |
| Despair | .09** | -.01 | .07* | .01 | .01 | .19*** | -.04 |
| Nostalgia | .03 | .09** | .05 | .03 | .001 | .002 | .03 |
| Grief | .05 | -.01 | -.04 | .03 | .03 | .10*** | -.08** |
| Dissatisfaction | .03 | .02 | -.03 | .03 | .10*** | .20*** | -.03 |

*Notes*. *N* = 1124, *** *p* < .001 ** *p* < .01 * *p* < .05

**Table S2.**

*Correlations between the socio-cultural political orientation and intensity of emotions per policy area*

|  | area of economy | area of social welfare | area of health | area of security from crime and terrorism | area of own way of life | area of tradition and culture | area of climate and environ- ment |
| --- | --- | --- | --- | --- | --- | --- | --- |
|  | socio- cultural political orientation | | | | | | |
| Happiness | .02 | .003 | .03 | .06* | .001 | .03 | .03 |
| Pride | .05 | .03 | .09** | .06* | .03 | -.03 | -.01 |
| Enthusiasm | .03 | .10*** | .07* | .08** | .01 | -.03 | .001 |
| Satisfaction | -.03 | .06 | .07* | -.05 | -.02 | -.09** | -.04 |
| Compassion | -.02 | -.01 | .03 | -.02 | .01 | -.002 | -.01 |
| Gratitude | .02 | .06* | -.03 | .02 | .02 | .05 | .03 |
| Curiosity | -.01 | .03 | .01 | .02 | -.01 | -.04 | .01 |
| Calmness | -.01 | -.04 | .001 | -.10*** | -.09* | -.11*** | .02 |
| Optimism | .01 | .01 | .01 | -.08* | -.001 | -09** | -.05 |
| Joy | .05 | -.03 | -.08** | .01 | .02 | .07* | -.01 |
| Discouragement | -.03 | -.01 | -.03 | -.02 | -.03 | .02 | -.06* |
| Hope | -.02 | .01 | .03 | .04 | -.03 | .001 | .06 |
| Fear | .02 | -.001 | .05 | .06* | .04 | .15*** | -.09** |
| Anxiety | -.02 | -.03 | -.07* | .05 | .03 | .15*** | -.12*** |
| Shame | .07* | -.02 | .01 | .05 | .01 | .18*** | -.02 |
| Sadness | -.01 | -.02 | -.04 | .05 | .03 | .13*** | -.09** |
| Contempt | .12*** | .03 | .04 | .07* | .02 | .13*** | .11*** |
| Anger | .13*** | .01 | -.04 | .10*** | .05 | .23*** | -.02 |
| Envy | -.02 | -.07* | .003 | .01 | .03 | .04 | -.05 |
| Disgust | .07* | .04 | .03 | .06 | .02 | .16*** | .06* |
| Disappointment | .04 | -.05 | -.07* | .05 | .05 | .15*** | -.11*** |
| Guilt | 0 | -.02 | .04 | -.01 | .03 | .03 | -.03 |
| Hate | .08* | -.03 | .04 | .05 | .03 | .11*** | .03 |
| Despair | .10*** | .02 | .03 | .004 | .01 | .22*** | -.05 |
| Nostalgia | .02 | .05 | .02 | -.01 | -.01 | .03 | .05 |
| Grief | .05 | .01 | -.03 | .05 | .02 | .12*** | -.08* |
| Dissatisfaction | -.004 | -.02 | -.08** | .04 | .07* | .22*** | -.03 |

*Notes*. *N* = 1124, *** *p* < .001 ** *p* < .01 * *p* < .05.

**A test of a five-profile solution, including all variables with a threshold of at least 5% of**

**indications**

To test the robustness of the Latent Profile Analysis, the test was repeated using a 5% threshold for the inclusion of emotional variables. The new analysis showed good fit indices (AIC = 409,464; BIC = 412,801) and very high entropy (98%). The composition of the profiles hardly differed from those obtained when using a 10% threshold of indications. Detailed means of individual emotions included in the analysis are provided in Table S3.

**Profile 1. Dissatisfied.** People from this profile are characterized by high negative and low positive emotional reactions across all areas of protection.

**Profile 2. Indifferent.** People from this profile are characterized by objectively low emotional reactions in all areas of protection.

**Profile 3. Content.** People from this profile are characterized by high positive and relatively low negative emotional reactions.

**Profile 4. Economically satisfied.** People from this profile are characterized by high satisfaction in the area of protection of the economy, while emotions in other areas are low and comparable to those of other profiles.

**Profile 5. Calm.** People from this profile are characterized by medium to low levels of mostly positive emotions.

**Table S3.**

*Means and standard deviations for all emotions included in the LPA analysis for each of the profiles.*

|  |  | Profile 1 | | Profile 2 | | Profile 3 | | Profile 4 | | Profile 5 | |
| --- | --- | --- | --- | --- | --- | --- | --- | --- | --- | --- | --- |
|  |  | *M* | *SD* | *M* | *SD* | *M* | *SD* | *M* | *SD* | *M* | *SD* |
| Economy | happy | 0.00 | 0.00 | 0.10 | 0.62 | 2.83 | 2.29 | 0.63 | 1.50 | 0.46 | 1.36 |
| satisfaction | 0.01 | 0.07 | 0.00 | 0.04 | 3.24 | 2.08 | 4.12 | 0.78 | 0.01 | 0.09 |
| gratitude | 0.04 | 0.43 | 0.04 | 0.41 | 2.83 | 2.12 | 0.75 | 1.65 | 0.71 | 1.57 |
| curiosity | 0.09 | 0.63 | 0.18 | 0.81 | 1.10 | 2.01 | 0.42 | 1.29 | 1.03 | 1.82 |
| calmness | 0.10 | 0.60 | 0.31 | 1.05 | 3.45 | 2.05 | 2.27 | 2.10 | 1.37 | 1.96 |
| optimism | 0.08 | 0.56 | 0.23 | 0.87 | 2.59 | 2.40 | 1.39 | 1.99 | 1.74 | 2.03 |
| joy | 0.00 | 0.00 | 0.05 | 0.42 | 2.10 | 2.27 | 0.66 | 1.55 | 0.79 | 1.66 |
| discouragement | 2.39 | 2.26 | 0.51 | 1.33 | 0.00 | 0.00 | 0.07 | 0.49 | 0.49 | 1.34 |
| hope | 0.27 | 0.96 | 0.55 | 1.35 | 2.72 | 2.23 | 1.65 | 2.15 | 2.15 | 2.09 |
| fear | 1.90 | 2.24 | 0.53 | 1.35 | 0.34 | 1.29 | 0.03 | 0.30 | 0.38 | 1.14 |
| anxiety | 2.92 | 2.21 | 1.33 | 1.88 | 0.31 | 1.17 | 0.05 | 0.50 | 0.80 | 1.61 |
| sadness | 1.92 | 1.77 | 0.32 | 0.94 | 0.14 | 0.00 | 0.06 | 0.00 | 0.18 | 0.88 |
| shame | 0.91 | 2.23 | 0.22 | 1.08 | 0.00 | 0.74 | 0.00 | 0.44 | 0.19 | 0.75 |
| contempt | 0.71 | 1.64 | 0.13 | 0.75 | 0.00 | 0.00 | 0.00 | 0.00 | 0.10 | 0.62 |
| anger | 1.81 | 2.20 | 0.25 | 0.97 | 0.00 | 0.00 | 0.02 | 0.20 | 0.14 | 0.76 |
| disappointment | 3.38 | 2.12 | 0.92 | 1.72 | 0.14 | 0.74 | 0.03 | 0.30 | 0.59 | 1.44 |
| despair | 1.10 | 1.90 | 0.14 | 0.77 | 0.00 | 0.00 | 0.05 | 0.50 | 0.16 | 0.78 |
| grief | 1.53 | 2.19 | 0.24 | 0.95 | 0.07 | 0.37 | 0.04 | 0.40 | 0.30 | 1.11 |
| dissatisfaction | 3.11 | 2.21 | 0.83 | 1.69 | 0.10 | 0.56 | 0.00 | 0.00 | 0.40 | 1.25 |
| social welfare | satisfaction | 0.00 | 0.00 | 0.06 | 0.47 | 2.66 | 2.30 | 0.92 | 1.75 | 0.80 | 1.71 |
| gratitude | 0.02 | 0.30 | 0.07 | 0.50 | 2.52 | 2.34 | 0.54 | 1.49 | 0.68 | 1.56 |
| curiosity | 0.03 | 0.37 | 0.07 | 0.49 | 1.24 | 1.94 | 0.50 | 1.36 | 0.68 | 1.58 |
| calmness | 0.00 | 0.00 | 0.23 | 0.90 | 3.45 | 2.03 | 0.91 | 1.70 | 1.59 | 2.00 |
| optimism | 0.02 | 0.22 | 0.07 | 0.47 | 1.79 | 2.21 | 0.91 | 1.79 | 1.53 | 1.97 |
| joy | 2.13 | 2.31 | 0.44 | 1.27 | 0.00 | 0.00 | 0.33 | 1.16 | 0.28 | 1.09 |
| discouragement | 0.14 | 0.74 | 0.22 | 0.89 | 2.45 | 2.28 | 1.05 | 1.84 | 1.78 | 2.07 |
| fear | 1.61 | 2.22 | 0.46 | 1.33 | 0.00 | 0.00 | 0.22 | 0.88 | 0.45 | 1.26 |
| anxiety | 2.32 | 2.39 | 0.92 | 1.71 | 0.53 | 1.38 | 0.49 | 1.33 | 0.64 | 1.50 |
| shame | 0.99 | 1.91 | 0.08 | 0.58 | 0.08 | 0.00 | 0.00 | 0.91 | 0.23 | 0.60 |
| sadness | 1.76 | 2.23 | 0.29 | 1.06 | 0.00 | 0.00 | 0.31 | 1.12 | 0.28 | 1.03 |
| anger | 1.58 | 2.23 | 0.20 | 0.92 | 0.00 | 0.00 | 0.09 | 0.63 | 0.04 | 0.47 |
| disappointment | 3.13 | 2.27 | 0.77 | 1.63 | 0.14 | 0.74 | 0.41 | 1.23 | 0.38 | 1.26 |
| despair | 1.17 | 2.04 | 0.19 | 0.90 | 0.14 | 0.74 | 0.04 | 0.40 | 0.14 | 0.77 |
| grief | 1.20 | 2.06 | 0.17 | 0.82 | 0.00 | 0.00 | 0.25 | 1.00 | 0.04 | 0.47 |
| dissatisfaction | 3.24 | 2.22 | 0.65 | 1.50 | 0.00 | 0.00 | 0.43 | 1.27 | 0.26 | 1.03 |
| health | happy | 0.03 | 0.37 | 0.02 | 0.29 | 2.41 | 2.40 | 0.46 | 1.33 | 0.72 | 1.63 |
| satisfaction | 0.04 | 0.40 | 0.11 | 0.63 | 3.10 | 2.21 | 0.71 | 1.63 | 0.71 | 1.66 |
| gratitude | 0.08 | 0.60 | 0.07 | 0.49 | 2.72 | 2.37 | 0.50 | 1.41 | 0.59 | 1.48 |
| calmness | 0.07 | 0.56 | 0.22 | 0.89 | 3.62 | 1.95 | 0.91 | 1.74 | 1.47 | 2.03 |
| optimism | 0.11 | 0.70 | 0.12 | 0.67 | 2.97 | 2.24 | 0.52 | 1.35 | 1.10 | 1.79 |
| joy | 2.07 | 2.37 | 0.48 | 1.32 | 0.10 | 0.56 | 0.50 | 1.33 | 0.37 | 1.19 |
| discouragement | 0.23 | 0.98 | 0.25 | 0.94 | 2.48 | 2.32 | 1.08 | 1.82 | 1.79 | 2.13 |
| fear | 2.40 | 2.37 | 0.62 | 1.51 | 0.34 | 1.29 | 0.45 | 1.35 | 0.51 | 1.38 |
| shame | 0.74 | 1.69 | 0.16 | 0.84 | 0.14 | 0.74 | 0.25 | 1.03 | 0.14 | 0.76 |
| sadness | 1.86 | 2.26 | 0.41 | 1.23 | 0.17 | 0.93 | 0.35 | 1.16 | 0.54 | 1.39 |
| anger | 2.02 | 2.33 | 0.41 | 1.26 | 0.17 | 0.93 | 0.45 | 1.27 | 0.26 | 0.98 |
| disappointment | 3.29 | 2.25 | 1.03 | 1.83 | 0.17 | 0.93 | 0.73 | 1.65 | 0.59 | 1.50 |
| despair | 1.47 | 2.20 | 0.30 | 1.11 | 0.17 | 0.93 | 0.09 | 0.63 | 0.16 | 0.84 |
| grief | 1.32 | 2.13 | 0.19 | 0.88 | 0.31 | 1.17 | 0.09 | 0.63 | 0.13 | 0.69 |
| dissatisfaction | 3.24 | 2.27 | 0.99 | 1.81 | 0.10 | 0.56 | 0.82 | 1.76 | 0.55 | 1.45 |
| security | happy | 0.04 | 0.42 | 0.09 | 0.56 | 3.00 | 2.30 | 0.46 | 1.36 | 0.54 | 1.46 |
| satisfaction | 0.24 | 1.01 | 0.22 | 0.92 | 2.93 | 2.37 | 0.61 | 1.49 | 0.88 | 1.72 |
| gratitude | 0.13 | 0.75 | 0.20 | 0.89 | 2.83 | 2.30 | 0.64 | 1.51 | 1.02 | 1.81 |
| calmness | 0.59 | 1.43 | 0.65 | 1.48 | 2.45 | 2.31 | 0.74 | 1.60 | 1.57 | 2.04 |
| optimism | 0.42 | 1.25 | 0.37 | 1.16 | 2.55 | 2.23 | 0.86 | 1.61 | 1.10 | 1.81 |
| joy | 0.80 | 1.76 | 0.12 | 0.69 | 0.00 | 0.00 | 0.15 | 0.74 | 0.10 | 0.62 |
| discouragement | 0.42 | 1.28 | 0.39 | 1.17 | 2.45 | 2.31 | 0.82 | 1.67 | 1.76 | 2.09 |
| fear | 1.71 | 2.29 | 0.46 | 1.32 | 0.31 | 1.17 | 0.48 | 1.34 | 0.53 | 1.40 |
| anxiety | 2.45 | 2.33 | 0.93 | 1.70 | 0.41 | 1.27 | 0.79 | 1.65 | 0.76 | 1.61 |
| sadness | 0.83 | 1.80 | 0.14 | 0.75 | 0.14 | 0.74 | 0.34 | 1.19 | 0.32 | 1.11 |
| anger | 1.04 | 1.99 | 0.10 | 0.66 | 0.17 | 0.93 | 0.22 | 0.92 | 0.13 | 0.71 |
| disappointment | 1.58 | 2.22 | 0.27 | 1.00 | 0.00 | 0.00 | 0.28 | 1.07 | 0.23 | 0.99 |
| dissatisfaction | 1.76 | 2.30 | 0.35 | 1.16 | 0.31 | 1.17 | 0.31 | 1.18 | 0.33 | 1.15 |
| way life | happy | 0.03 | 0.37 | 0.05 | 0.43 | 3.07 | 2.17 | 0.62 | 1.53 | 0.89 | 1.76 |
| enthusiasm | 0.00 | 0.00 | 0.07 | 0.52 | 2.38 | 2.27 | 0.34 | 1.19 | 0.82 | 1.65 |
| satisfaction | 0.16 | 0.83 | 0.22 | 0.90 | 3.62 | 1.95 | 0.96 | 1.82 | 1.21 | 1.91 |
| gratitude | 0.10 | 0.70 | 0.05 | 0.46 | 2.62 | 2.34 | 0.37 | 1.23 | 0.74 | 1.59 |
| curiosity | 0.14 | 0.75 | 0.13 | 0.68 | 1.48 | 2.12 | 0.43 | 1.28 | 1.38 | 2.06 |
| calmness | 0.39 | 1.25 | 0.56 | 1.39 | 2.62 | 2.29 | 1.24 | 1.95 | 1.44 | 2.01 |
| optimism | 0.28 | 1.01 | 0.29 | 1.03 | 2.72 | 2.20 | 0.67 | 1.58 | 1.64 | 2.06 |
| joy | 1.18 | 2.02 | 0.15 | 0.75 | 0.15 | 0.00 | 0.22 | 0.96 | 0.13 | 0.67 |
| discouragement | 0.50 | 1.39 | 0.24 | 0.95 | 2.31 | 2.32 | 0.82 | 1.67 | 1.80 | 2.13 |
| hope | 0.12 | 0.73 | 0.07 | 0.49 | 3.59 | 2.15 | 0.58 | 1.54 | 1.11 | 1.87 |
| fear | 0.69 | 1.62 | 0.15 | 0.75 | 0.31 | 1.17 | 0.24 | 0.97 | 0.13 | 0.76 |
| anxiety | 1.63 | 2.18 | 0.45 | 1.26 | 0.31 | 0.97 | 0.47 | 1.34 | 0.29 | 1.09 |
| sadness | 1.08 | 1.96 | 0.13 | 0.73 | 0.00 | 0.00 | 0.28 | 1.07 | 0.07 | 0.55 |
| disappointment | 1.74 | 2.26 | 0.24 | 0.98 | 0.00 | 0.00 | 0.34 | 1.15 | 0.13 | 0.64 |
| dissatisfaction | 1.97 | 2.35 | 0.28 | 1.02 | 0.14 | 0.74 | 0.19 | 0.84 | 0.02 | 0.19 |
| tradition | happy | 0.12 | 0.75 | 0.11 | 0.66 | 2.69 | 2.33 | 0.34 | 1.20 | 0.69 | 1.57 |
| pride | 0.43 | 1.36 | 0.40 | 1.25 | 3.45 | 2.20 | 1.10 | 1.92 | 1.90 | 2.19 |
| satisfaction | 0.54 | 1.48 | 0.37 | 1.13 | 3.28 | 2.27 | 1.10 | 1.83 | 1.33 | 1.97 |
| gratitude | 0.13 | 0.79 | 0.17 | 0.82 | 2.45 | 2.28 | 0.66 | 1.56 | 0.94 | 1.79 |
| curiosity | 0.23 | 0.97 | 0.23 | 0.90 | 1.38 | 2.11 | 0.58 | 1.42 | 0.92 | 1.81 |
| calmness | 0.45 | 1.35 | 0.54 | 1.38 | 2.48 | 2.46 | 1.04 | 1.87 | 1.23 | 1.91 |
| optimism | 0.56 | 1.47 | 0.41 | 1.23 | 2.28 | 2.42 | 0.73 | 1.66 | 1.39 | 2.04 |
| discouragement | 0.47 | 1.35 | 0.34 | 1.09 | 2.69 | 2.33 | 0.81 | 1.69 | 1.44 | 2.04 |
| hope | 0.13 | 0.79 | 0.12 | 0.70 | 2.07 | 2.36 | 0.83 | 1.73 | 0.73 | 1.65 |
| anxiety | 1.20 | 2.03 | 0.39 | 1.22 | 0.17 | 0.93 | 0.25 | 1.00 | 0.36 | 1.18 |
| shame | 0.91 | 1.87 | 0.14 | 0.76 | 0.31 | 1.17 | 0.08 | 0.56 | 0.25 | 0.94 |
| sadness | 0.85 | 1.79 | 0.18 | 0.83 | 0.31 | 1.17 | 0.25 | 1.00 | 0.13 | 0.76 |
| anger | 0.77 | 1.74 | 0.13 | 0.78 | 0.00 | 0.00 | 0.07 | 0.49 | 0.04 | 0.47 |
| disappointment | 1.61 | 2.25 | 0.26 | 1.00 | 0.31 | 1.17 | 0.28 | 1.08 | 0.10 | 0.60 |
| nostalgia | 0.57 | 1.51 | 0.20 | 0.88 | 0.48 | 1.46 | 0.15 | 0.75 | 0.49 | 1.38 |
| grief | 0.66 | 1.61 | 0.11 | 0.68 | 0.00 | 0.00 | 0.13 | 0.74 | 0.09 | 0.55 |
| dissatisfaction | 1.34 | 2.11 | 0.33 | 1.14 | 0.00 | 0.00 | 0.12 | 0.69 | 0.11 | 0.66 |
| climate | satisfaction | 0.20 | 0.93 | 0.08 | 0.59 | 2.45 | 2.43 | 0.44 | 1.26 | 0.61 | 1.47 |
| curiosity | 0.33 | 1.17 | 0.19 | 0.86 | 1.76 | 2.18 | 0.55 | 1.42 | 1.14 | 1.91 |
| calmness | 0.20 | 0.90 | 0.18 | 0.81 | 2.31 | 2.33 | 0.30 | 1.01 | 0.83 | 1.68 |
| optimism | 0.25 | 1.01 | 0.23 | 0.92 | 2.10 | 2.29 | 0.59 | 1.39 | 1.18 | 1.91 |
| joy | 1.32 | 2.09 | 0.24 | 0.95 | 0.52 | 1.55 | 0.25 | 0.92 | 0.15 | 0.81 |
| discouragement | 0.46 | 1.31 | 0.43 | 1.27 | 2.24 | 2.18 | 1.00 | 1.85 | 1.45 | 2.03 |
| fear | 1.08 | 1.98 | 0.22 | 0.94 | 0.48 | 1.46 | 0.28 | 1.07 | 0.48 | 1.35 |
| anxiety | 1.61 | 2.24 | 0.96 | 1.76 | 1.03 | 2.06 | 0.83 | 1.64 | 1.64 | 2.14 |
| shame | 0.83 | 1.78 | 0.22 | 0.94 | 0.14 | 0.74 | 0.25 | 0.99 | 0.18 | 0.86 |
| sadness | 1.28 | 2.06 | 0.30 | 1.07 | 0.52 | 1.55 | 0.22 | 0.88 | 0.46 | 1.32 |
| anger | 1.01 | 1.96 | 0.19 | 0.88 | 0.00 | 0.00 | 0.12 | 0.69 | 0.28 | 1.04 |
| disappointment | 1.82 | 2.30 | 0.62 | 1.50 | 0.31 | 1.17 | 0.61 | 1.48 | 0.63 | 1.56 |
| despair | 0.52 | 1.42 | 0.16 | 0.83 | 0.17 | 0.93 | 0.19 | 0.93 | 0.21 | 0.96 |
| dissatisfaction | 2.02 | 2.32 | 0.64 | 1.51 | 0.62 | 1.59 | 0.63 | 1.55 | 0.56 | 1.46 |
